# Supplementary material
Source: Elsevier journal article supplement (https://www.sciencedirect.com/science/article/pii/S0210569116301322)
Supplement: mmc1 [file S0210569116301322:mmc1.docx]

# ANEXO 1. ENCUESTA IBEROAMERICANA DE TRANSPORTE PEDIÁTRICO

**DATOS GENERALES DEL INFORMADOR**

Fecha:

DATOS PERSONALES:

Nombre:

Profesión:

Especialidad médica: NO Pediatría Otra especialidad:

Cargo: ………………………..

Correo electrónico:

HOSPITAL O CENTRO SANITARIO

Nombre:

País:

Región: Ciudad:

¿Es su hospital un centro receptor de pacientes transportados?: Sí No

¿Qué tipo de paciente recibe su hospital? (Señale con una X)

Pediátrico

Neonatal

Pediátrico + Neonatal

Adultos + Pediátrico y/o neonatal

¿Es su hospital un centro emisor de pacientes a transportar?: Sí No

¿Qué tipo de paciente traslada su hospital (Señale con una X)

Pediátrico

Neonatal

Pediátrico + Neonatal

Adultos + Pediátrico y/o neonatal

¿Dispone su hospital de área de pacientes críticos para la atención pediátrica-neonatal?

UCI-Pediátrica

UCI-Neonatal

UCI mixta (Pediátrico + Neonatal)

UCI general (Adultos + Niños)

**SISTEMAS DE TRANSPORTE NACIONAL**

¿Existe un sistema organizado de atención médica urgente prehospitalaria?

Sí No

¿Existe sistema unificado de transporte pediátrico en su país? Sí No

Si existe descríbalo brevemente (si existen varios descríbalos todos):

¿Es un sistema específico Pediátrico Neonatal Sistema mixto pediátrico y del adulto?

¿Es público o privado?: Público Privado (incluye el transporte cubierto por compañías de seguros privadas)

¿Está disponible las 24 horas del día todos los días del año? Sí No*

* Especifique el horario disponible:

¿Existe un centro de coordinación para los traslados? Sí No (los traslados se gestionan exclusivamente por contacto entre los centros emisor y receptor)

Si existe centro de coordinación, ¿dónde se encuentra y de quién depende (p.ej., S.E.M -Sistema de Emergencias médicas-, Cruz Roja, Bomberos u otra institución)?

**SISTEMAS DE TRANSPORTE REGIONAL**

¿Existe un sistema organizado de atención médica urgente prehospitalaria?

Sí No

¿Existe sistema unificado de transporte pediátrico en su región/comunidad autónoma? Sí No

Si existe descríbalo brevemente:

¿Es un sistema específico Pediátrico Neonatal Sistema mixto pediátrico y del adulto?

¿Es público o privado?: Público Privado (incluye el transporte cubierto por compañías de seguros privadas)

¿Está disponible las 24 horas del día todos los días del año? Sí No*

* Especifique el horario disponible:

¿Existe un centro de coordinación para los traslados? Sí No (los traslados se gestionan exclusivamente por contacto entre los centros emisor y receptor)

Si existe centro de coordinación, ¿dónde se encuentra y de quién depende (p.ej., S.E.M -Sistema de Emergencias Médicas-, Cruz Roja, Bomberos u otra institución)?

**SISTEMAS DE TRANSPORTE EN SU PROVINCIA-CIUDAD**

¿Existe un sistema organizado de atención médica urgente prehospitalaria?

Sí No

¿Existe sistema unificado de transporte pediátrico en su provincia-ciudad?

Sí No

Si existe descríbalo brevemente:

¿Es un sistema específico Pediátrico Neonatal Sistema mixto pediátrico y del adulto?

¿Es público o privado?: Público Privado (incluye el transporte cubierto por compañías de seguros privadas)

¿Está disponible las 24 horas del día todos los días del año? Sí No*

* Especifique el horario disponible:

¿Existe un centro de coordinación para los traslados? Sí No (los traslados se gestionan exclusivamente por contacto entre los centros emisor y receptor)

Si existe centro de coordinación, ¿dónde se encuentra y de quién depende (p.ej., S.E.M -Sistema de Emergencias médicas-, Cruz Roja, Bomberos u otra institución)?

**CARACTERÍSTICAS DEL SISTEMA DE TRANSPORTE LOCAL**

Población infantil (del país, región o comunidad autónoma, provincia o ciudad a la que se ofrece cobertura de transporte; número total, con especificación de la edad considerada): ……………….….... (0 - X años)

Rango de edad de atención pediátrica (de 0 hasta años cumplidos):

Número de traslados realizados al año como hospital emisor: (si se conoce)

- Neonatos:……………..
- Niños:…..……………..

**Sistema de transporte**

¿Cómo se hacen los traslados en su hospital cuando tiene que recibir un paciente de otro hospital? (señale con un X)

Sistema de transporte público

Sistema de transporte e privado

Equipo de transporte del propio hospital

Equipo e de transporte del hospital de origen (hospital emisor)

No existe sistema específico (ambulancia más personal no específico de transporte, del propio hospital, del hospital emisor o de otra procedencia)

¿Cómo se hacen los traslados en su hospital cuando tiene que remitir un paciente a otro hospital? (señale con un X)

Sistema de transporte público

Sistema de transporte privado

Equipo de transporte del propio hospital

Equipo de transporte del hospital de destino (hospital receptor)

No existe sistema (ambulancia más personal no específico de transporte, del propio hospital, del hospital receptor o de otra procedencia)

**Perfil de pacientes**

¿Qué tipos de paciente traslada el sistema de transporte? (Señale con una X)

Pediátrico

Neonatal

Pediátrico + Neonatal

Adultos + Niños

**Tipo y vehículo de traslado** (señale TODAS las opciones posibles con una X)

Terrestre:

Ambulancia convencional no medicalizada

UVI móvil general

UVI móvil pediátrica

Aéreo:

Vuelo convencional

Helicóptero sanitario general

Avión ambulancia

Marítimo-Fluvial

**Material de traslado**

Lo desconozco

Se dispone del material específico de traslado: Sí No

1. **Neonatal** (señale TODAS las opciones posibles con una X)

Incubadora terrestre

Incubadora aérea

Incubadora de uso terrestre o aéreo indistintamente

Pulsioxímetro

Capnografía

Monitor multiparamétrico

Respirador neonatal

Material para ventilación e intubación neonatales (bolsa autoinflable, mascarilla facial, cánulas orofaríngeas, laringoscopio y tubos endotraqueales)

Material para el manejo hemodinámico: catéteres umbilicales.

Monitor-Desfibrilador

Óxido nítrico

OTRO:

1. **Pediátrico** (señale TODAS las opciones posibles con una X)

Pulsioxímetro

Capnografía

Monitor multiparamétrico

Respirador pediátrico

Material para ventilación e intubación pediátricos (bolsa autoinflable, mascarilla facial, cánulas orofaríngeas, laringoscopio y tubos endotraqueales)

Material para el manejo hemodinámico: acceso intraóseo y vías centrales.

Monitor-Desfibrilador

Óxido nítrico

Colchón de vacío

Material de trauma pediátrico: collarines cervicales, tabla espinal

OTRO:

**Equipo humano de traslado** (señale TODAS las opciones apropiadas con una X)

Médico:

Pediatra

Médico no pediatra

Enfermera

Enfermera neonatal-pediátrica

Enfermera no pediátrica

Paramédico

Técnico sanitario

Si existe un equipo específico de traslado, detalle quiénes lo componen:

**Formación del personal de traslado**

¿Existe algún sistema de formación del personal de traslado? Sí No

¿Existe una formación específica en traslado pediátrico y neonatal? Sí No

Si existe formación específica en traslado pediátrico y neonatal describa brevemente cómo se realiza:

**Documentación para el traslado**

¿Se cumplimenta una hoja específica en la que se recojan los datos relativos al traslado (datos del paciente, evaluación y tratamientos, evolución, etc.)? Sí No

¿Se solicita consentimiento formal y escrito para el traslado? Sí No

**Patologías como motivo de traslado**

Señale y categorice las patologías que con más frecuencia requieren transporte en su hospital actuando tanto como receptor o como emisor (1 la más frecuente 2 la segunda en frecuencia y 3 la tercera más frecuente)

Neonatales

( ) Prematuridad

( ) Síndrome de aspiración meconial

( ) Cardiopatía

( ) Asfixia perinatal

( ) Infección

( ) Trastorno hidroelectrolítico y/o metabolopatía

( ) Malformación congénita (excluyendo cardiopatía congénita)

( ) OTRA:

Pediátricas

( ) Respiratoria

( ) Neurológica

( ) Cardiopatía

( ) Infección

( ) Trastorno hidroelectrolítico y/o metabolopatía

( ) Patología quirúrgica

( ) Trauma

( ) OTRA:

**¿Cómo valora globalmente el sistema de transporte local?**

ADECUADO

SUFICIENTE

INSUFICIENTE
